# Supplementary material for: Adiponectin and IGFBP-1 in the development of gestational diabetes in obese mothers
Source: PubMed Central journal article supplement — BMJ Open Diabetes Res Care. 2014 Apr 23;2(1):e000010. doi: 10.1136/bmjdrc-2013-000010 (PMC4212565; doi:10.1136/bmjdrc-2013-000010), 2014-04-23

### Supplemental Figure 1. Correlation matrix of maternal parameters.

A heat map of the Pearson correlation matrix for maternal parameters measured at 24-28 weeks gestation. The color indicates the value of the correlation as shown to the right. Values of all significant correlations ( $p < 0.05$ ) are given with degree of significance indicated (\*  $p < 0.01$ , \*\*  $p < 0.001$ , \*\*\*  $p < 0.0001$ , \*\*\*\*  $p < 0.00001$ ). The bottom left half of the matrix displays scatter plots of the corresponding significant variables. The matrix diagonal contains the frequency distribution histogram of each parameter corresponding to row/column.

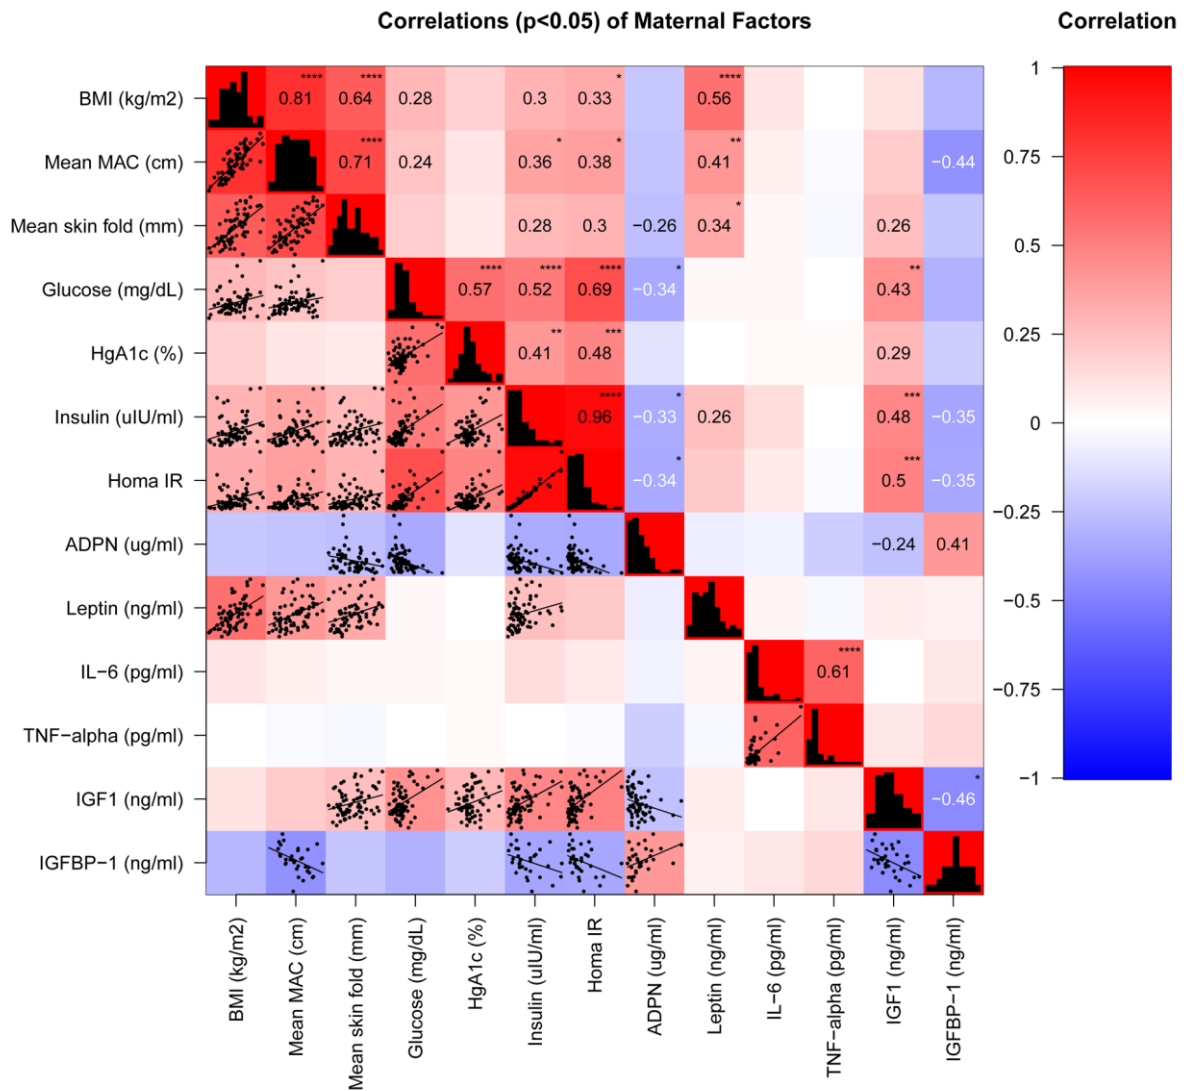

Supplement: bmjdrc-2013-000010-s1.pdf [file bmjdrc-2013-000010-s1.pdf]
